# Supplementary material for: A Comparison of Bonded and Nonbonded Zinc(II) Force Fields with NMR Data
Source: MDPI journal article supplement (doi:10.3390/ijms24065440), 2023-03-13
Supplement: s1 [file s1]

The following input files were used for 2L7X and are reported here as an example of the protocol used to run the MD simulations for all systems.

### **NONBONDED SIMULATIONS input files**

#### **min.in**

Minimization with Cartesian restraints for the solute

```
&cntrl  
imin=1, maxcyc=200,  
ntpr=5,  
ntr=1,restraint_wt=10,restraintmask='1-77'  
/  

```

#### **min2.in**

Minimization with Cartesian

```
&cntrl  
imin=1, maxcyc=500,  
ntpr=5,  
ntr=0  
/  

```

#### **heat1.in**

Heating up the system equilibration stage 1

```
&cntrl  
nstlim=50000, dt=0.002, ntx=1, irest=0, ntpr=500, ntwr=5000, ntwx=50,  
temp1=100.0, temp0=300.0, ntt=1, tautp=2.0, ig=-1,  
  
ntb=1, ntp=0,  
  
ntc=2, ntf=2,  
  
nrespa=2,  
&end
```

#### **heat2.in**

Constant pressure constant temperature equilibration stage 2

```
&cntrl  
nstlim=5000, dt=0.002, ntx=5, irest=1, ntpr=500, ntwr=5000, ntwx=5000,  
temp0=300.0, ntt=1, tautp=2.0,  
  
ntb=2, ntp=1,  
  
ntc=2, ntf=2,
```

```
nrespa=1,  
&end
```

### **dina.in**

Constant pressure constant temperature production run

```
&cntrl
```

```
nstlim=50000000, dt=0.002, ntx=5, irest=1, ntp=500, ntwr=5000, ntwx=5000,  
temp0=300.0, ntt=1, tautp=2.0,
```

```
ntb=2, ntp=1,
```

```
ntc=2, ntf=2,
```

```
nrespa=1,  
&end
```

### **dina2.in**

Constant pressure constant temperature production run

```
&cntrl
```

```
nstlim=50000000, dt=0.002, ntx=5, irest=1, ntp=5000, ntwr=5000, ntwx=5000,  
temp0=300.0, ntt=1, tautp=2.0,
```

```
ntb=2, ntp=1,
```

```
ntc=2, ntf=2,
```

```
nrespa=1,  
&end
```

### **dina3.in**

Constant pressure constant temperature production run

```
&cntrl
```

```
nstlim=50000000, dt=0.002, ntx=5, irest=1, ntp=5000, ntwr=5000, ntwx=5000,  
temp0=300.0, ntt=1, tautp=2.0,
```

```
ntb=2, ntp=1,
```

```
ntc=2, ntf=2,
```

```
nrespa=1,  
&end
```

#### **dina4.in**

Constant pressure constant temperature production run

```
&cntrl  
nstim=50000000, dt=0.002, ntx=5, irest=1, ntp=5000, ntwr=5000, ntwx=5000,  
temp0=300.0, ntt=1, tautp=2.0,
```

```
ntb=2, ntp=1,
```

```
ntc=2, ntf=2,
```

```
nrespa=1,  
&end
```

#### **dina5.in**

Constant pressure constant temperature production run

```
&cntrl  
nstim=50000000, dt=0.002, ntx=5, irest=1, ntp=5000, ntwr=5000, ntwx=5000,  
temp0=300.0, ntt=1, tautp=2.0,
```

```
ntb=2, ntp=1,
```

```
ntc=2, ntf=2,
```

```
nrespa=1,  
&end
```

### **BONDED SIMULATIONS input files**

#### **min.in**

```
&cntrl  
imin=1, maxcyc=200,  
ntpr=5,  
ntr=1, restraint_wt=10, restraintmask=':1-77'  
/
```

#### **min2.in**

Minimization with Cartesian

```
&cntrl  
imin=1, maxcyc=500,  
ntpr=5,  
ntr=0  
/
```

### **heat1.in**

Heating up the system equilibration stage 1

```
&cntrl  
nstlim=50000, dt=0.002, ntx=1, irest=0, ntpr=500, ntwr=5000, ntwx=50,  
temp0=100.0, temp0=300.0, ntt=1, tautp=2.0, ig=-1,  
  
ntb=1, ntp=0,  
  
ntc=2, ntf=2,  
  
nrespa=2,  
&end
```

### **heat2.in**

Constant pressure constant temperature equilibration stage 2

```
&cntrl  
nstlim=5000, dt=0.002, ntx=5, irest=1, ntpr=500, ntwr=5000, ntwx=5000,  
temp0=300.0, ntt=1, tautp=2.0,  
  
ntb=2, ntp=1,  
  
ntc=2, ntf=2,  
  
nrespa=1,  
&end
```

### **dina.in**

Constant pressure constant temperature production run

```
&cntrl  
nstlim=50000000, dt=0.002, ntx=5, irest=1, ntpr=500, ntwr=50000, ntwx=5000,  
temp0=300.0, ntt=1, tautp=2.0,  
  
ntb=2, ntp=1,  
  
ntc=2, ntf=2,
```

```
nrespa=1,  
&end
```

#### **dina2.in**

Constant pressure constant temperature production run

```
&cntrl
```

```
nstlim=50000000, dt=0.002, ntx=5, irest=1, ntp=500, ntwr=50000, ntwx=5000,  
temp0=300.0, ntt=1, tautp=2.0,
```

```
ntb=2, ntp=1,
```

```
ntc=2, ntf=2,
```

```
nrespa=1,  
&end
```

#### **dina3.in**

Constant pressure constant temperature production run

```
&cntrl
```

```
nstlim=50000000, dt=0.002, ntx=5, irest=1, ntp=500, ntwr=50000, ntwx=5000,  
temp0=300.0, ntt=1, tautp=2.0,
```

```
ntb=2, ntp=1,
```

```
ntc=2, ntf=2,
```

```
nrespa=1,  
&end
```

#### **dina4.in**

Constant pressure constant temperature production run

```
&cntrl
```

```
nstlim=50000000, dt=0.002, ntx=5, irest=1, ntp=500, ntwr=50000, ntwx=5000,  
temp0=300.0, ntt=1, tautp=2.0,
```

```
ntb=2, ntp=1,
```

```
ntc=2, ntf=2,
```

```
nrespa=1,  
&end
```

**dina5.in**

Constant pressure constant temperature production run

&cntrl

nstlim=50000000, dt=0.002, ntx=5, irest=1, ntpr=500, ntwr=50000, ntwx=5000,  
temp0=300.0, ntt=1, tautp=2.0,

ntb=2, ntp=1,

ntc=2, ntf=2,

nrespa=1,

&end
