# Supplementary material for: A Comparison of Bonded and Nonbonded Zinc(II) Force Fields with NMR Data
Source: MDPI journal article supplement (doi:10.3390/ijms24065440), 2023-03-13
Supplement: s1 [file s1]

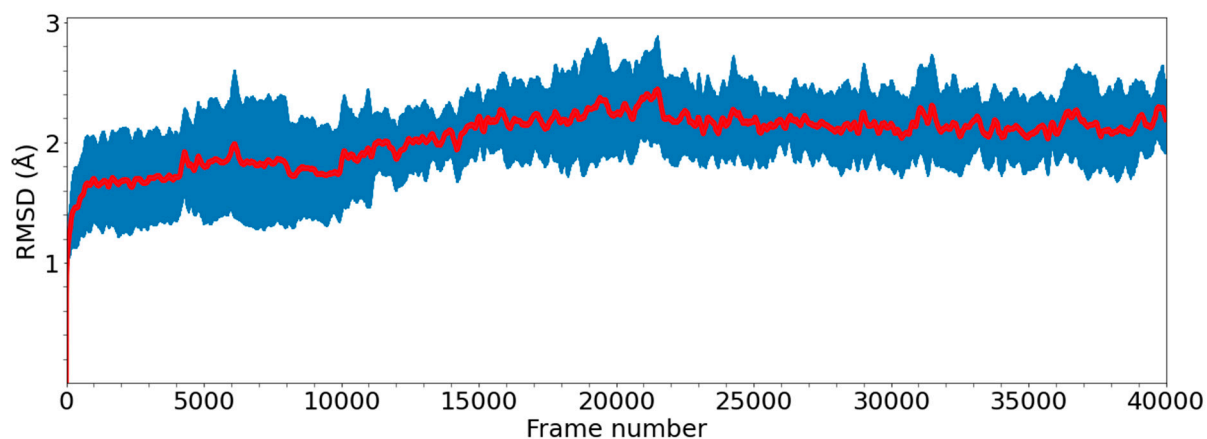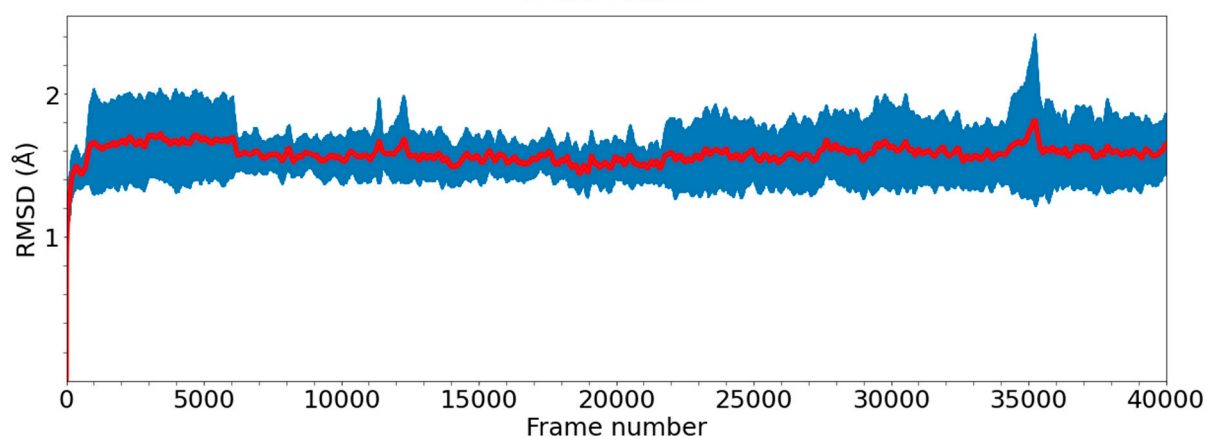

**Figure S1.** Smoothed mean RMSD for 2NAX computed for the NBFF (upper panel) and ZAFF (lower panel).

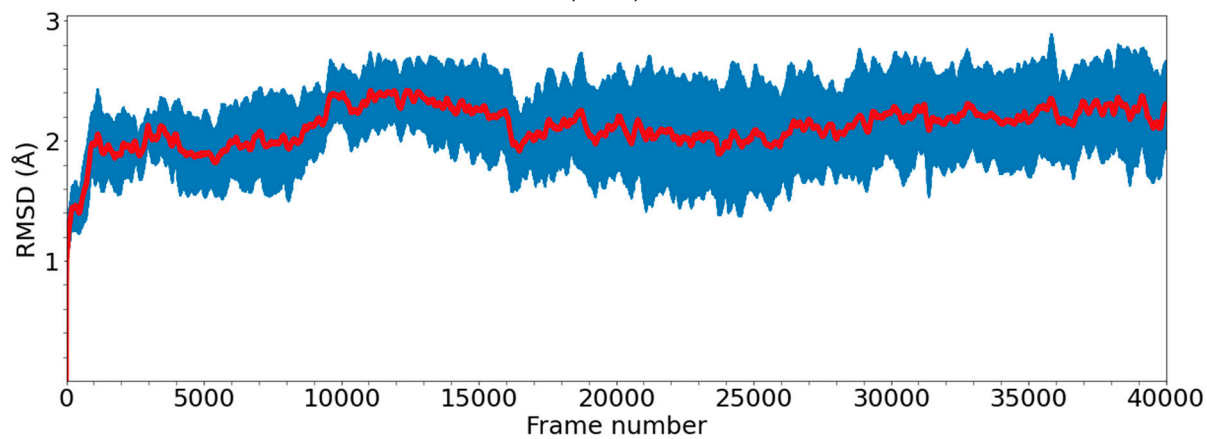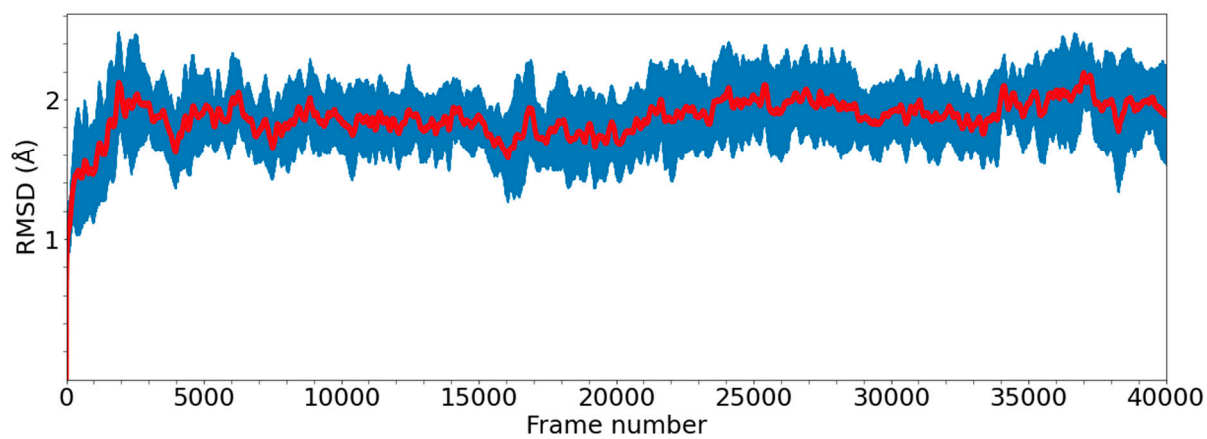

**Figure S2.** Smoothed mean RMSD for 5JPX computed for the NBFF (upper panel) and ZAFF (lower panel).

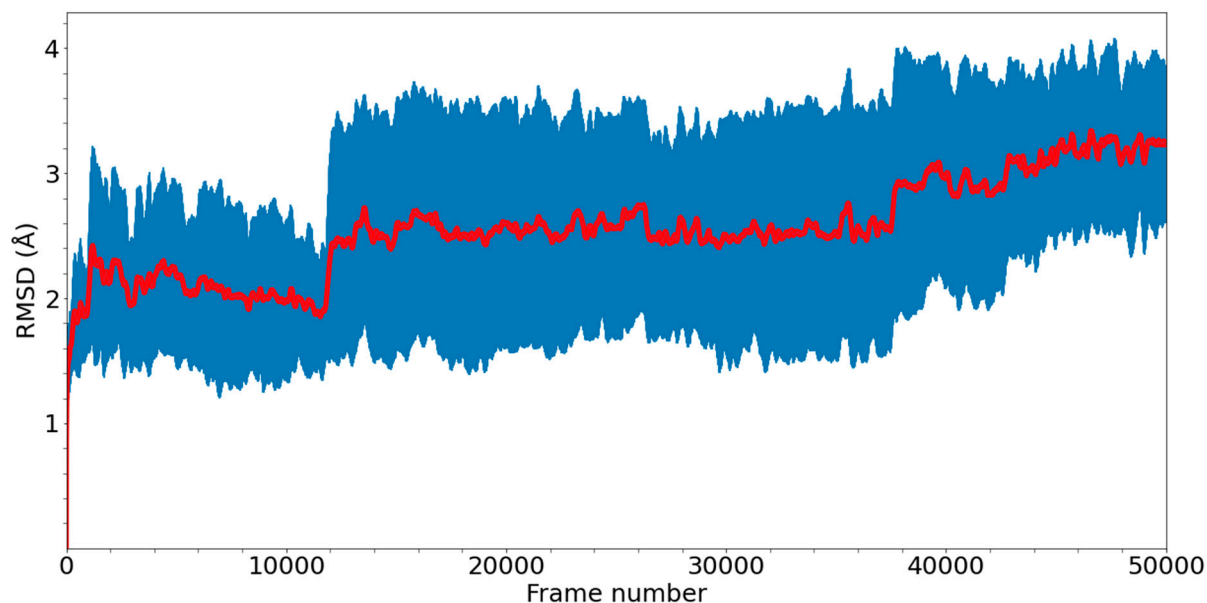

**Figure S3.** Smoothed mean RMSD for 2JOX computed for the NBFF. Simulations with ZAFF were not performed since it is not parametrized for binuclear sites.

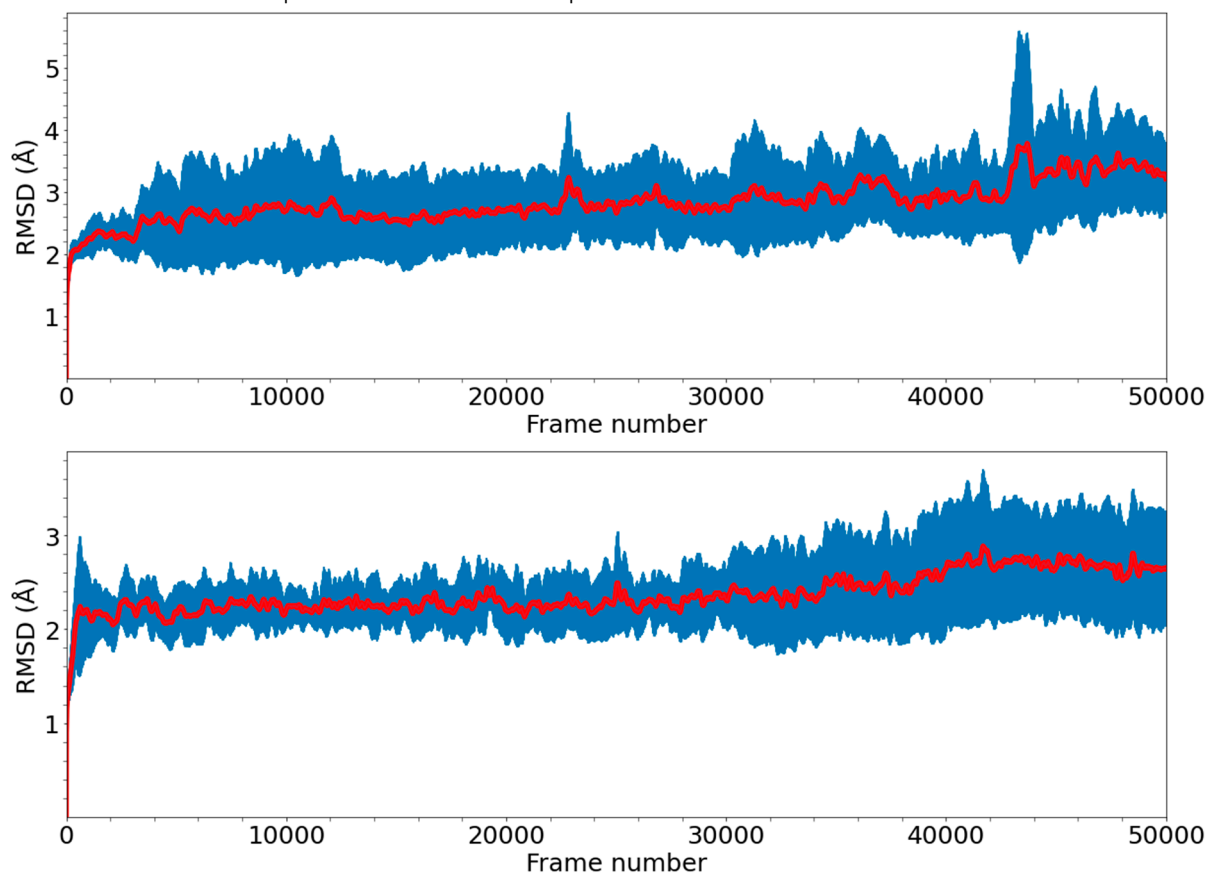

**Figure S4.** Smoothed mean RMSD for 2L7X computed for the NBFF (upper panel) and ZAFF (lower panel).

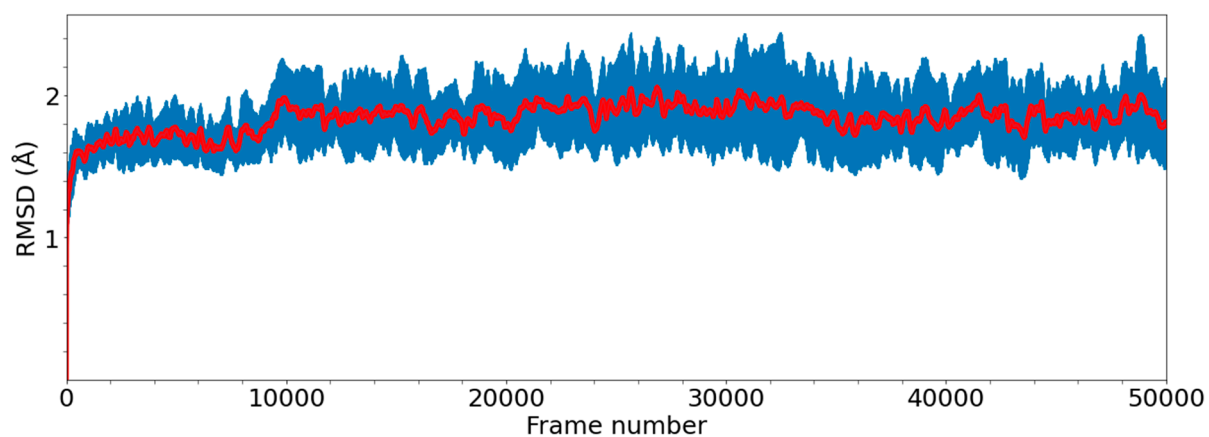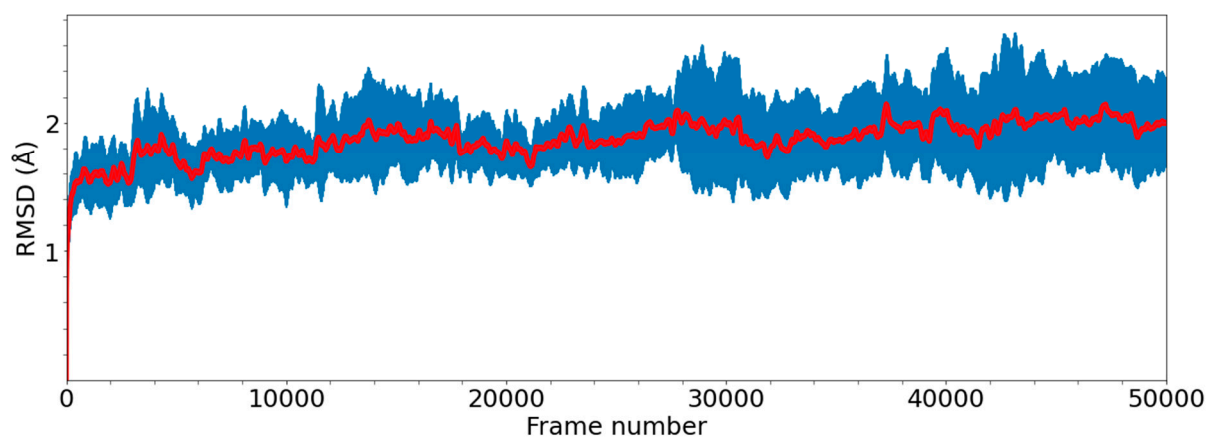

**Figure S5.** Smoothed mean RMSD for 1CHC computed for the NBFF (upper panel) and ZAFF (lower panel).

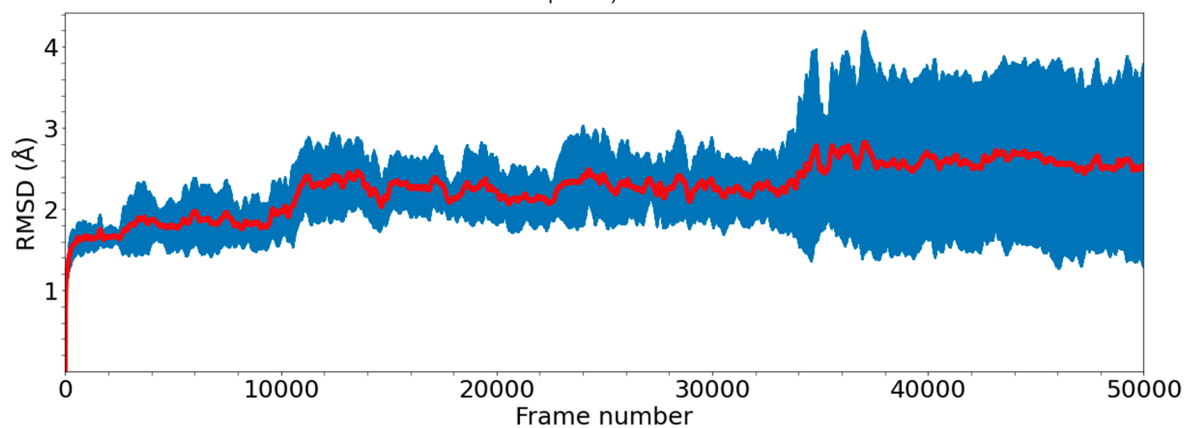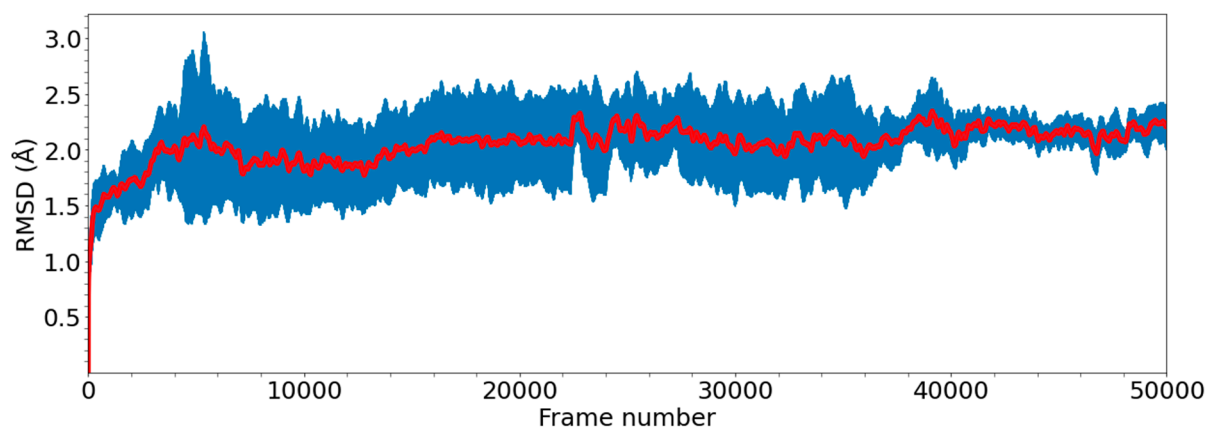

**Figure S6.** Smoothed mean RMSD for 2K9H computed for the NBFF (upper panel) and ZAFF (lower panel).

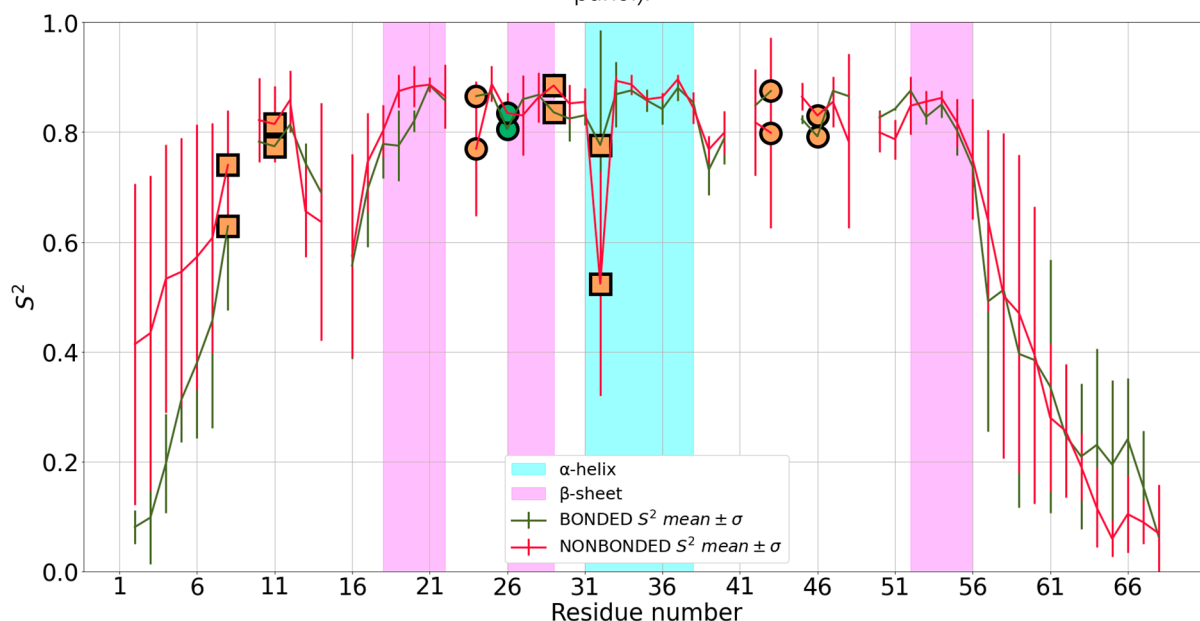

**Figure S7.** Mean  $S^2$  of 1CHC and standard deviation (SD) for bonded (red) and nonbonded (green) superimposed. Orange markers represent the position in the sequence of zinc(II)-binding Cys residues, whereas the green markers represent zinc(II)-binding His residues. Residues belonging to the same site are represented with the same marker shape.

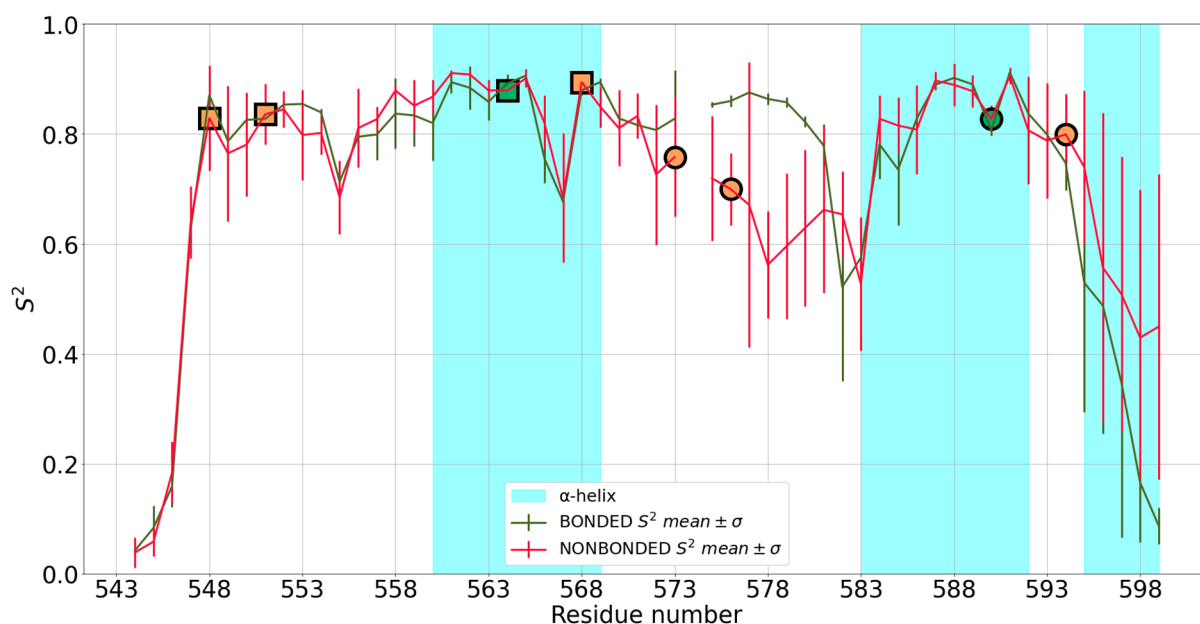

**Figure S8.** Mean  $S^2$  of 2K9H and standard deviation (SD) for bonded (red) and nonbonded (green) superimposed. Orange markers represent the position in the sequence of zinc(II)-binding Cys residues, whereas the green markers represent zinc(II)-binding His residues. Residues belonging to the same site are represented with the same marker shape.
